# Supplementary material for: A nomogram to predict stricture after endoscopic submucosal dissection for early esophageal cancer
Source: Research Square preprint supplement (doi:10.21203/rs.3.rs-733195/v1), 2021-08-10
Supplement: Supplementary file 1 [file 6c5d8656e7c7eeabe752fc31.docx]

**Table 1.** Baseline characteristics of the patients.

|  | Stricture (+) | Stricture (-) | *P* value |
| --- | --- | --- | --- |
| **Number** (n) | 28 | 243 |  |
| **Patient factors** |  |  |  |
| Mean age ±SD (years) | 61.61±12.84 | 61.59±9.62 | 0.99 |
| Sex (male/female, n) | 19/9 | 179/43 | 0.51 |
| Drinking history，yes (n) | 12(43%) | 111(46%) | 0.78 |
| Smoking history, yes (n) | 14(50%) | 118(49%) | 0.89 |
| Family history, yes (n) | 6(21%) | 66(27%) | 0.52 |
| BMI ±SD (kg/m2) | 24.45±6.13 | 23.79±3.30 | 0.38 |
| **Lesion factors** |  |  |  |
| Lesion location of esophagus (n) |  |  | 0.01 |
| Upper segment | 5(18%) | 24(10%) |  |
| Middle segment | 11(39%) | 76(31%) |  |
| Lower segment | 12(43%) | 143(59%) |  |
| Esophageal circumference involved (n) | |  | <0.01 |
| <1/2 | 4(14%) | 147(60%) |  |
| 1/2-3/4 | 9(32%) | 72(30%) |  |
| >3/4 | 15(54%) | 24(10%) |  |
| Longitudinal lesion length |  |  | <0.01 |
| >50mm | 13(46%) | 43(18%) | <0.01 |
| <50mm | 15(54%) | 200(82%) |  |
| Tumor infiltration depth (n) |  |  | 0.26 |
| m1/m2 | 19(68%) | 170(70%) |  |
| m3/sm | 8(29%) | 43(18%） |  |
| Missing | 1(4%) | 30(12%) |  |
| **Treatment factors** |  |  |  |
| Operation time ±SD (minutes) | 195.75±111.06 | 130.51±52.74 | <0.01 |
| Mean number of clips ±SD (n) | 2.89±3.62 | 1.72±3.45 | 0.09 |
| Mean day of hospitalization ±SD (days) | 19.43±20.87 | 11.74±4.39 | 0.06 |
| Glucocorticoid prevention, yes (n) | 7(25%) | 20(8%) | <0.01 |
| Postoperative fever, yes (n) | 25(89%) | 109(45%) | <0.01 |
| WBC>109/L (n) | 17(61%) | 91(37%) | 0.02 |
| Perforation (n) | 6(21%) | 23(9%) | 0.05 |
