# Supplementary material for: A nomogram to predict stricture after endoscopic submucosal dissection for early esophageal cancer
Source: Research Square preprint supplement (doi:10.21203/rs.3.rs-733195/v1), 2021-08-10
Supplement: Supplementary file 2 [file b2fb2762e2962a53a1d1ec11.docx]

**Table 2.** Factors associated with stricture formation in Cox proportional hazard model.

| Factors | Univariate analysis | | |  | Multivariate analysis | | |
| --- | --- | --- | --- | --- | --- | --- | --- |
| *P* value | HR | 95%CI |  | *P* value | HR | 95% CI |
| Operation time (for 1-minute increase) | <0.01 | 1.01 | (1.01-1.01) |  | <0.01 | 1.01 | (1.00-1.01) |
| ﻿Longitudinal lesion length >50mm (vs no) | <0.01 | 4.28 | (2.03-9.02) |  |  |  |  |
| Lower esophagus |  | 1.00 |  |  |  | 1.00 |  |
| Upper esophagus | 0.04 | 2.90 | (1.05-8.01) |  | <0.01 | 6.48 | (2.07-20.33) |
| Middle esophagus | 0.12 | 1.95 | (0.84-4.52) |  | <0.01 | 3.42 | (1.36-8.64) |
| <1/2 circumference involved |  | 1.00 |  |  |  | 1.00 |  |
| <3/4 circumference involved | 0.03 | 3.63 | (1.10-10.29) |  | 0.44 | 1.61 | (0.49-5.36) |
| >3/4 circumference involved | <0.01 | 15.37 | (5.56-42.47) |  | <0.01 | 6.32 | (2.20-18.13) |
| Perforation (vs no) | 0.05 | 2.50 | (1.01-6.18) |  |  |  |  |
| Postoperative fever (vs no) | <0.01 | 9.92 | (2.99-32.89) |  | <0.01 | 6.17 | (1.75-21.77) |
| Glucocorticoid prevention (vs no) | 0.01 | 3.15 | (1.34-7.44) |  |  |  |  |
| WBC>109/L (n) | 0.04 | 2.24 | (1.05-4.79) |  |  |  |  |
